# Supplementary material
Source: PubMed Central journal article supplement (PMC7436481)
Supplement: JMV-93-649-s001.pdf [file JMV-93-649-s001.pdf]

**SUPPLEMENTARY TABLE S1** Data from worldwide nations

| Nation                              | Total confirmed cases | Total population (thousands) | Cases per 100,000 population | Population ages 0-14 (%) | Population ages ≥65 (%) | GDP per capita, PPP (current international \$) | GNI per capita, PPP (current international \$) | Life expectancy at birth (years) | Medical-doctor density (/10,000 population) | Nursing/midwifery-personnel density (/10,000 population) |
|-------------------------------------|-----------------------|------------------------------|------------------------------|--------------------------|-------------------------|------------------------------------------------|------------------------------------------------|----------------------------------|---------------------------------------------|----------------------------------------------------------|
| Afghanistan                         | 15094                 | 37172                        | 40.61                        | 43                       | 3                       | 2225.8                                         | 2240                                           | 62.6                             | 2.8                                         | 1.8                                                      |
| Albania                             | 1136                  | 2883                         | 39.40                        | 18                       | 14                      | 13835.5                                        | 13820                                          | 76.4                             | 12.2                                        | 36.5                                                     |
| Algeria                             | 9267                  | 42228                        | 21.95                        | 30                       | 6                       | 11759.2                                        | 11370                                          | 76.4                             | 17.2                                        | 15.5                                                     |
| Andorra                             | 764                   | 77                           | 992.21                       | N/A                      | N/A                     | N/A                                            | N/A                                            | N/A                              | 33.3                                        | 40.1                                                     |
| Angola                              | 84                    | 30810                        | 0.27                         | 47                       | 2                       | 7093.0                                         | 6780                                           | 62.6                             | 2.1                                         | 4.1                                                      |
| Antigua and Barbuda                 | 25                    | 96                           | 26.04                        | 22                       | 9                       | 21630.2                                        | 20520                                          | 75.0                             | 29.6                                        | 45.2                                                     |
| Argentina                           | 14702                 | 44361                        | 33.14                        | 25                       | 11                      | 23300.0                                        | 22470                                          | 76.9                             | 39.9                                        | 26.0                                                     |
| Armenia                             | 9282                  | 2952                         | 314.43                       | 21                       | 11                      | 13024.7                                        | 13190                                          | 74.8                             | 44.0                                        | 61.1                                                     |
| Australia                           | 7185                  | 24898                        | 28.86                        | 19                       | 16                      | 51036.4                                        | 49440                                          | 82.9                             | 36.8                                        | 125.5                                                    |
| Austria                             | 16638                 | 8891                         | 187.13                       | 14                       | 19                      | 56871.2                                        | 56720                                          | 81.8                             | 51.7                                        | 2.6                                                      |
| Azerbaijan                          | 5246                  | 9950                         | 52.72                        | 23                       | 6                       | 14543.2                                        | 13780                                          | 73.1                             | 34.5                                        | 64.3                                                     |
| Bahamas                             | 101                   | 386                          | 26.17                        | 22                       | 7                       | 36365.3                                        | 34370                                          | 75.7                             | 20.1                                        | 45.7                                                     |
| Bahrain                             | 10793                 | 1569                         | 687.89                       | 19                       | 2                       | 47297.0                                        | 44700                                          | 79.1                             | 9.3                                         | 24.9                                                     |
| Bangladesh                          | 44608                 | 161377                       | 27.64                        | 28                       | 5                       | 4549.6                                         | 4760                                           | 72.7                             | 5.8                                         | 4.1                                                      |
| Barbados                            | 92                    | 287                          | 32.06                        | 17                       | 16                      | 16107.0                                        | 14140                                          | 75.6                             | 24.8                                        | 30.6                                                     |
| Belarus                             | 41658                 | 9453                         | 440.69                       | 17                       | 15                      | 19345.3                                        | 18650                                          | 74.2                             | 51.9                                        | 110.0                                                    |
| Belgium                             | 58186                 | 11482                        | 506.76                       | 17                       | 19                      | 52254.0                                        | 52590                                          | 81.1                             | 30.7                                        | 194.6                                                    |
| Belize                              | 18                    | 383                          | 4.70                         | 30                       | 5                       | 7360.0                                         | 6650                                           | 70.5                             | 11.2                                        | 23.4                                                     |
| Benin                               | 232                   | 11485                        | 2.02                         | 42                       | 3                       | 3237.8                                         | 3200                                           | 61.1                             | 0.8                                         | 3.9                                                      |
| Bhutan                              | 33                    | 754                          | 4.38                         | 26                       | 6                       | 11621.8                                        | 10580                                          | 70.6                             | 4.2                                         | 18.5                                                     |
| Bolivia<br>(Plurinational State of) | 8731                  | 11353                        | 76.90                        | 31                       | 7                       | 8866.4                                         | 8640                                           | 71.5                             | 15.9                                        | 15.6                                                     |
| Bosnia and Herzegovina              | 2493                  | 3324                         | 75.00                        | 15                       | 16                      | 14962.0                                        | 14920                                          | 77.3                             | 21.6                                        | 57.3                                                     |
| Botswana                            | 35                    | 2254                         | 1.55                         | 34                       | 4                       | 18059.3                                        | 17460                                          | 66.1                             | 5.3                                         | 54.0                                                     |
| Brazil                              | 465166                | 209469                       | 222.07                       | 21                       | 9                       | 14951.8                                        | 14530                                          | 75.1                             | 21.6                                        | 101.2                                                    |
| Brunei Darussalam                   | 141                   | 429                          | 32.87                        | 23                       | 5                       | 61859.9                                        | 62820                                          | 76.4                             | 16.1                                        | 59.0                                                     |
| Bulgaria                            | 2513                  | 7052                         | 35.64                        | 15                       | 21                      | 22304.9                                        | 22650                                          | 74.9                             | 40.3                                        | 48.2                                                     |
| Burkina Faso                        | 853                   | 19751                        | 4.32                         | 45                       | 2                       | 1904.9                                         | 1890                                           | 60.3                             | 0.8                                         | 8.8                                                      |
| Burundi                             | 42                    | 11175                        | 0.38                         | 46                       | 2                       | 780.1                                          | 780                                            | 60.1                             | 1.0                                         | 8.5                                                      |
| Cabo Verde                          | 421                   | 544                          | 77.39                        | 29                       | 5                       | 7068.1                                         | 6900                                           | 73.2                             | 7.8                                         | 13.0                                                     |

|                                  |        |         |        |     |     |         |       |      |      |       |
|----------------------------------|--------|---------|--------|-----|-----|---------|-------|------|------|-------|
| Cambodia                         | 125    | 16250   | 0.77   | 31  | 5   | 4261.8  | 3970  | 69.4 | 1.9  | 6.9   |
| Cameroon                         | 5659   | 25216   | 22.44  | 43  | 3   | 3691.3  | 3610  | 58.1 | 0.9  | 0.1   |
| Canada                           | 89741  | 37075   | 242.05 | 16  | 17  | 49994.1 | 49430 | 82.8 | 23.1 | 99.4  |
| Central African Republic         | 874    | 4666    | 18.73  | 44  | 3   | 955.8   | 1030  | 53.0 | 0.7  | 2.1   |
| Chad                             | 759    | 15478   | 4.90   | 47  | 2   | 1618.9  | 1590  | 54.3 | 0.4  | 2.3   |
| Chile                            | 94858  | 18729   | 506.48 | 20  | 12  | 24763.0 | 23750 | 79.5 | 25.9 | 133.2 |
| China                            | 84570  | 1435651 | 5.89   | 18  | 11  | 15376.2 | 15320 | 76.4 | 19.8 | 26.6  |
| Colombia                         | 26688  | 49661   | 53.74  | 23  | 8   | 14834.4 | 15320 | 75.1 | 21.8 | 13.3  |
| Comoros                          | 43     | 832     | 5.17   | 40  | 3   | 3141.5  | 3160  | 63.9 | 2.7  | 6.3   |
| Congo                            | 587    | 5244    | 11.19  | 42  | 3   | 3357.6  | 3000  | 64.3 | 1.6  | 6.3   |
| Costa Rica                       | 1022   | 4999    | 20.44  | 21  | 10  | 19762.5 | 18670 | 79.6 | 28.9 | 34.1  |
| Côte d'Ivoire                    | 2799   | 25069   | 11.17  | 42  | 3   | 3832.1  | 3660  | N/A  | 2.3  | 6.0   |
| Croatia                          | 2246   | 4156    | 54.04  | 15  | 20  | 28115.5 | 27700 | 78.2 | 30.0 | 81.2  |
| Cuba                             | 2025   | 11338   | 17.86  | 16  | 15  | N/A     | N/A   | 79.0 | 84.2 | 75.6  |
| Cyprus                           | 943    | 1189    | 79.31  | 17  | 14  | 38513.3 | 39880 | 80.7 | 19.5 | 52.5  |
| Czechia                          | 9230   | 10666   | 86.54  | 16  | 19  | 40428.7 | 38180 | 79.1 | 41.2 | 84.0  |
| Democratic Republic of the Congo | 2965   | 84068   | 3.53   | 46  | 3   | 1111.7  | 1070  | 60.5 | 0.7  | 11.1  |
| Denmark                          | 11633  | 5752    | 202.24 | 16  | 20  | 57218.4 | 57980 | 81.2 | 40.1 | 103.2 |
| Djibouti                         | 3194   | 959     | 333.06 | 30  | 5   | 5225.0  | 5400  | 63.8 | 2.2  | 7.3   |
| Dominica                         | 16     | 72      | 22.22  | N/A | N/A | 11814.3 | 10900 | N/A  | 11.2 | 64.4  |
| Dominican Republic               | 16908  | 10627   | 159.10 | 28  | 7   | 18143.2 | 17330 | 73.5 | 15.3 | 13.8  |
| Ecuador                          | 38571  | 17084   | 225.77 | 28  | 7   | 11853.7 | 11530 | 76.5 | 20.4 | 25.1  |
| Egypt                            | 23449  | 98424   | 23.82  | 34  | 5   | 11643.2 | 11350 | 70.5 | 4.5  | 19.3  |
| El Salvador                      | 2395   | 6421    | 37.30  | 27  | 8   | 8816.6  | 8320  | 73.7 | 15.7 | 18.3  |
| Equatorial Guinea                | 1043   | 1309    | 79.68  | 37  | 2   | 20855.8 | 15750 | 59.5 | 4.0  | 5.0   |
| Eritrea                          | 39     | 3453    | 1.13   | N/A | 4   | N/A     | N/A   | 65.0 | 0.6  | 14.4  |
| Estonia                          | 1865   | 1323    | 140.97 | 16  | 20  | 36358.0 | 35340 | 77.8 | 44.8 | 111.6 |
| Eswatini                         | 283    | 1136    | 24.91  | 38  | 4   | 8815.7  | 8820  | N/A  | 3.3  | 41.4  |
| Ethiopia                         | 1063   | 109224  | 0.97   | 41  | 4   | 2154.4  | 2140  | 65.5 | 0.8  | 7.1   |
| Fiji                             | 18     | 883     | 2.04   | 30  | 5   | 14144.4 | 13180 | 69.9 | 8.6  | 33.8  |
| Finland                          | 6826   | 5523    | 123.59 | 16  | 22  | 49549.4 | 49720 | 81.4 | 38.1 | 147.4 |
| France                           | 148436 | 64991   | 228.39 | 18  | 20  | 46447.4 | 47490 | 82.9 | 32.7 | 114.7 |
| Gabon                            | 2613   | 2119    | 123.31 | 37  | 4   | 15102.5 | 14110 | 66.4 | 6.8  | 29.5  |
| Gambia                           | 25     | 2280    | 1.10   | 44  | 3   | 2196.5  | 2160  | 61.9 | 1.0  | 15.4  |

|                                  |        |         |        |    |    |          |       |      |      |       |
|----------------------------------|--------|---------|--------|----|----|----------|-------|------|------|-------|
| Georgia                          | 783    | 4003    | 19.56  | 20 | 15 | 14594.7  | 13980 | 72.6 | 71.2 | 47.3  |
| Germany                          | 181482 | 83124   | 218.33 | 14 | 21 | 54456.9  | 55980 | 80.9 | 42.5 | 132.4 |
| Ghana                            | 7768   | 29767   | 26.10  | 38 | 3  | 5321.0   | 5220  | 63.4 | 1.4  | 42.0  |
| Greece                           | 2915   | 10522   | 27.70  | 14 | 22 | 30357.6  | 30430 | 81.1 | 54.8 | 36.3  |
| Grenada                          | 23     | 111     | 20.72  | 24 | 10 | 17234.7  | 15620 | 73.4 | 14.1 | 62.8  |
| Guatemala                        | 4607   | 17248   | 26.71  | 34 | 5  | 8655.4   | 8500  | 73.2 | 3.5  | 0.7   |
| Guinea                           | 3706   | 12414   | 29.85  | 44 | 3  | 2555.9   | 2510  | 59.8 | 0.8  | 1.2   |
| Guinea-Bissau                    | 1256   | 1874    | 67.02  | 42 | 3  | 1996.7   | 1990  | 59.8 | 1.3  | 6.9   |
| Guyana                           | 150    | 779     | 19.26  | 28 | 6  | 9539.0   | 9300  | 66.2 | 8.0  | 10.4  |
| Haiti                            | 1584   | 11123   | 14.24  | 33 | 5  | 1810.2   | 1820  | 63.5 | 2.3  | 6.8   |
| Honduras                         | 4886   | 9588    | 50.96  | 32 | 5  | 5810.4   | 5350  | 75.2 | 3.1  | 7.4   |
| Hungary                          | 3867   | 9708    | 39.83  | 14 | 19 | 31578.8  | 30310 | 76.0 | 34.1 | 69.2  |
| Iceland                          | 1806   | 337     | 535.91 | 20 | 15 | 58058.2  | 55920 | 82.4 | 40.8 | 162.1 |
| India                            | 182143 | 1352642 | 13.47  | 27 | 6  | 6697.2   | 6630  | 68.8 | 8.6  | 17.3  |
| Indonesia                        | 25773  | 267671  | 9.63   | 27 | 6  | 11646.5  | 11290 | 69.3 | 4.3  | 24.1  |
| Iran (Islamic Republic of)       | 148950 | 81800   | 182.09 | 24 | 6  | 14535.9  | 14560 | 75.7 | 15.8 | 4.4   |
| Iraq                             | 6179   | 38434   | 16.08  | 38 | 3  | 10919.9  | 10780 | 69.9 | 7.1  | 20.4  |
| Ireland                          | 24929  | 4819    | 517.31 | 21 | 14 | 84459.8  | 68060 | 81.5 | 33.1 | 161.0 |
| Israel                           | 17012  | 8382    | 202.96 | 28 | 12 | 40261.3  | 40280 | 82.3 | 46.2 | 3.3   |
| Italy                            | 232664 | 60627   | 383.76 | 13 | 23 | 42798.1  | 43260 | 82.7 | 39.8 | 57.4  |
| Jamaica                          | 575    | 2935    | 19.59  | 24 | 9  | 9975.2   | 9520  | 76.0 | 13.1 | 8.1   |
| Japan                            | 16851  | 127202  | 13.25  | 13 | 28 | 41473.3  | 43010 | 84.2 | 24.1 | 121.5 |
| Jordan                           | 734    | 9965    | 7.37   | 34 | 4  | 10094.0  | 10050 | 74.3 | 23.2 | 28.2  |
| Kazakhstan                       | 10858  | 18320   | 59.27  | 28 | 7  | 26172.4  | 22950 | 71.1 | 39.8 | 72.9  |
| Kenya                            | 1888   | 51393   | 3.67   | 40 | 2  | 4294.9   | 4260  | 66.7 | 1.6  | 11.7  |
| Kuwait                           | 26192  | 4137    | 633.12 | 22 | 3  | 51708.3  | 59760 | 74.8 | 26.5 | 74.1  |
| Kyrgyzstan                       | 1748   | 6304    | 27.73  | 32 | 4  | 5245.1   | 5110  | 71.4 | 22.1 | 59.4  |
| Lao People's Democratic Republic | 19     | 7061    | 0.27   | 33 | 4  | 7777.8   | 7410  | 65.8 | 3.7  | 9.5   |
| Latvia                           | 1065   | 1928    | 55.24  | 16 | 20 | 30744.8  | 30220 | 75.1 | 31.9 | 47.5  |
| Lebanon                          | 1191   | 6859    | 17.36  | 26 | 7  | 16416.9  | 16330 | 76.3 | 21.0 | 16.7  |
| Lesotho                          | 2      | 2108    | 0.09   | 33 | 5  | 3068.2   | 3500  | 52.9 | 0.7  | 32.6  |
| Liberia                          | 280    | 4819    | 5.81   | 41 | 3  | 1533.5   | 1330  | 62.9 | 0.4  | 5.3   |
| Libya                            | 130    | 6679    | 1.95   | 28 | 4  | 14423.3  | 14820 | 71.9 | 20.9 | 65.3  |
| Lithuania                        | 1670   | 2801    | 59.62  | 15 | 20 | 35831.9  | 34680 | 75.0 | 63.5 | 98.5  |
| Luxembourg                       | 4016   | 604     | 664.90 | 16 | 14 | 116786.5 | 74400 | 82.5 | 30.1 | 121.7 |
| Madagascar                       | 758    | 26262   | 2.89   | 41 | 3  | 1652.4   | 1600  | 66.1 | 1.8  | 1.5   |

|                     |        |        |         |     |     |         |       |      |      |       |
|---------------------|--------|--------|---------|-----|-----|---------|-------|------|------|-------|
| Malawi              | 279    | 18143  | 1.54    | 44  | 3   | 1071.3  | 1070  | 64.2 | 0.4  | 4.4   |
| Malaysia            | 7762   | 31528  | 24.62   | 24  | 7   | 28207.7 | 27200 | 75.3 | 15.4 | 34.7  |
| Maldives            | 1672   | 516    | 324.03  | 20  | 4   | 18959.4 | 17480 | 78.4 | 45.6 | 64.3  |
| Mali                | 1250   | 19078  | 6.55    | 48  | 3   | 2344.3  | 2280  | 58.0 | 1.3  | 3.6   |
| Malta               | 616    | 439    | 140.32  | 14  | 20  | 43538.5 | 40120 | 81.4 | 28.6 | 94.8  |
| Mauritania          | 483    | 4403   | 10.97   | 40  | 3   | 3802.9  | 3770  | 63.9 | 1.9  | 9.3   |
| Mauritius           | 335    | 1267   | 26.44   | 18  | 11  | 22752.2 | 24980 | 74.8 | 25.3 | 35.2  |
| Mexico              | 84627  | 126191 | 67.06   | 27  | 7   | 20396.5 | 19870 | 76.6 | 23.8 | 24.0  |
| Monaco              | 98     | 39     | 251.28  | N/A | N/A | 12564.9 | N/A   | N/A  | 75.1 | 201.6 |
| Mongolia            | 179    | 3170   | 5.65    | 30  | 4   | 12203.5 | 11050 | 69.8 | 28.6 | 38.9  |
| Montenegro          | 324    | 628    | 51.59   | 18  | 15  | 21301.5 | 21550 | 76.8 | 27.6 | 52.3  |
| Morocco             | 7780   | 36029  | 21.59   | 27  | 7   | 8611.7  | 8430  | 76.0 | 7.3  | 13.9  |
| Mozambique          | 244    | 29496  | 0.83    | 45  | 3   | 1321.0  | 1290  | 60.1 | 0.8  | 6.8   |
| Myanmar             | 224    | 53708  | 0.42    | 26  | 6   | 4996.0  | 4860  | 66.8 | 6.8  | 10.0  |
| Namibia             | 23     | 2448   | 0.94    | 37  | 4   | 10704.7 | 10490 | 63.7 | 4.2  | 19.5  |
| Nepal               | 1401   | 28096  | 4.99    | 30  | 6   | 3330.6  | 3360  | 70.2 | 7.5  | 31.1  |
| Netherlands         | 46257  | 17060  | 271.14  | 16  | 19  | 57565.2 | 58140 | 81.6 | 36.1 | 111.8 |
| New Zealand         | 1154   | 4743   | 24.33   | 20  | 16  | 42193.8 | 40550 | 82.2 | 35.9 | 124.5 |
| Nicaragua           | 885    | 6466   | 13.69   | 30  | 5   | 5833.6  | 5700  | 75.5 | 9.8  | 15.3  |
| Niger               | 956    | 22443  | 4.26    | 50  | 3   | 888.8   | 870   | 59.8 | 0.4  | 2.7   |
| Nigeria             | 9855   | 195875 | 5.03    | 44  | 3   | 5281.4  | 5040  | 55.2 | 3.8  | 11.8  |
| North Macedonia     | 2164   | 2083   | 103.89  | 17  | 14  | 16624.9 | 15930 | N/A  | 28.7 | 37.9  |
| Norway              | 8411   | 5338   | 157.57  | 18  | 17  | 67640.2 | 70530 | 82.5 | 29.2 | 182.2 |
| Oman                | 10423  | 4829   | 215.84  | 22  | 2   | 29289.7 | 29160 | 77.0 | 20.0 | 42.0  |
| Pakistan            | 69496  | 212228 | 32.75   | 35  | 4   | 4854.9  | 29160 | 66.5 | 9.8  | 6.7   |
| Panama              | 12531  | 4177   | 300.00  | 27  | 8   | 31834.0 | 29340 | 78.0 | 15.7 | 30.7  |
| Papua New Guinea    | 8      | 8606   | 0.09    | 36  | 3   | 4336.2  | 4220  | 65.9 | 0.7  | 4.5   |
| Paraguay            | 964    | 6956   | 13.86   | 29  | 6   | 13204.3 | 12830 | 74.2 | 13.5 | 16.6  |
| Peru                | 148285 | 31989  | 463.55  | 26  | 8   | 13093.7 | 12450 | 75.9 | 13.0 | 24.4  |
| Philippines         | 17224  | 106651 | 16.15   | 31  | 5   | 8321.2  | 9980  | 69.3 | 6.0  | 49.4  |
| Poland              | 23571  | 37922  | 62.16   | 15  | 18  | 31755.8 | 30410 | 77.7 | 23.8 | 68.9  |
| Portugal            | 32203  | 10256  | 313.99  | 13  | 22  | 34272.0 | 33520 | 81.4 | 51.2 | 69.7  |
| Qatar               | 55262  | 2782   | 1986.41 | 14  | 1   | 96804.7 | 94910 | 78.1 | 24.9 | 72.6  |
| Republic of Korea   | 11468  | 51172  | 22.41   | 13  | 14  | 39660.9 | 39630 | 82.7 | 23.6 | 73.0  |
| Republic of Moldova | 8098   | 4052   | 199.85  | 16  | 11  | 12564.9 | 13170 | 71.5 | 32.1 | 49.2  |
| Romania             | 19133  | 19506  | 98.09   | 16  | 18  | 29061.3 | 28350 | 75.2 | 29.8 | 73.9  |

|                                  |        |        |         |     |     |          |       |      |      |       |
|----------------------------------|--------|--------|---------|-----|-----|----------|-------|------|------|-------|
| Russian Federation               | 405843 | 145734 | 278.48  | 18  | 15  | 28556.3  | 27840 | 72.0 | 37.5 | 85.4  |
| Rwanda                           | 359    | 12302  | 2.92    | 40  | 3   | 2114.1   | 2070  | 68.0 | 1.3  | 12.0  |
| Saint Kitts and Nevis            | 15     | 52     | 28.85   | N/A | N/A | 26530.9  | 25060 | N/A  | 26.8 | 42.2  |
| Saint Lucia                      | 18     | 182    | 9.89    | 19  | 10  | 13960.4  | 13060 | 75.6 | 6.4  | 31.5  |
| Saint Vincent and the Grenadines | 25     | 110    | 22.73   | 23  | 10  | 12770.1  | 12640 | 72.0 | 6.6  | 70.1  |
| San Marino                       | 687    | 34     | 2020.59 | N/A | N/A | 63037.1  | N/A   | N/A  | 61.1 | 82.1  |
| São Tomé and Príncipe            | 295    | 211    | 139.81  | 43  | 3   | 4,040.90 | 4060  | 68.7 | 0.5  | 19.2  |
| Saudi Arabia                     | 83384  | 33703  | 247.41  | 25  | 3   | 48756.2  | 49200 | 74.8 | 26.1 | 54.8  |
| Senegal                          | 3535   | 15854  | 22.30   | 43  | 3   | 3430.2   | 3330  | 66.8 | 0.7  | 3.1   |
| Serbia                           | 11381  | 8803   | 129.29  | 16  | 18  | 17617.0  | 16710 | 76.3 | 31.1 | 60.9  |
| Seychelles                       | 11     | 97     | 11.34   | 24  | 8   | 28243.3  | 26920 | 73.3 | 21.2 | 80.8  |
| Sierra Leone                     | 852    | 7650   | 11.14   | 41  | 3   | 1703.8   | 1580  | 53.1 | 0.3  | 2.2   |
| Singapore                        | 34366  | 5758   | 596.84  | 12  | 11  | 98827.4  | 92150 | 82.9 | 22.9 | 62.4  |
| Slovakia                         | 1521   | 5453   | 27.89   | 15  | 16  | 32616.6  | 31960 | 77.4 | 34.2 | 3.2   |
| Slovenia                         | 1473   | 2078   | 70.89   | 15  | 20  | 38749.3  | 31960 | 80.9 | 30.9 | 99.7  |
| Somalia                          | 1916   | 15008  | 12.77   | 47  | 3   | N/A      | 860   | 55.4 | 0.2  | 1.1   |
| South Africa                     | 30967  | 57793  | 53.58   | 29  | 5   | 12938.4  | 12530 | 63.6 | 9.1  | 13.1  |
| South Sudan                      | 994    | 10976  | 9.06    | 42  | 3   | N/A      | N/A   | 58.6 | N/A  | N/A   |
| Spain                            | 239600 | 46693  | 513.14  | 15  | 19  | 40483.6  | 40570 | 83.0 | 38.7 | 57.3  |
| Sri Lanka                        | 1620   | 21229  | 7.63    | 24  | 10  | 13254.7  | 12900 | 75.3 | 10.0 | 21.8  |
| Sudan                            | 4800   | 41802  | 11.48   | 41  | 4   | 4767.7   | 4430  | 65.1 | 2.6  | 7.0   |
| Suriname                         | 12     | 576    | 2.08    | 27  | 7   | 16151.2  | 14390 | 71.8 | 12.1 | 27.6  |
| Sweden                           | 37113  | 9972   | 372.17  | 18  | 20  | 53807.9  | 54640 | 82.3 | 39.8 | 118.2 |
| Switzerland                      | 30762  | 8526   | 360.80  | 15  | 19  | 69366.4  | 70140 | 83.3 | 43.0 | 175.4 |
| Syrian Arab Republic             | 122    | 16945  | 0.72    | 31  | 5   | N/A      | N/A   | 63.8 | 12.9 | 15.4  |
| Tajikistan                       | 3807   | 9101   | 41.83   | 37  | 3   | 3313.5   | 3890  | 70.8 | 21.0 | 47.5  |
| Thailand                         | 3081   | 69428  | 4.44    | 17  | 12  | 18481.9  | 17650 | 75.5 | 8.1  | 27.6  |
| The United Kingdom               | 272830 | 67142  | 406.35  | 18  | 18  | 46867.9  | 46240 | 81.4 | 28.1 | 81.7  |
| Timor-Leste                      | 24     | 1268   | 1.89    | 38  | 4   | 3154.9   | 4520  | 68.6 | 7.2  | 16.7  |
| Togo                             | 428    | 7889   | 5.43    | 41  | 3   | 1590.4   | 1600  | 60.6 | 0.8  | 4.1   |
| Trinidad and Tobago              | 116    | 1390   | 8.35    | 20  | 11  | 26912.9  | 26050 | 71.8 | 41.7 | 40.9  |
| Tunisia                          | 1076   | 11565  | 9.30    | 24  | 8   | 11009.5  | 10630 | 76.0 | 13.0 | 25.1  |

|                                    |         |        |        |    |    |         |       |      |      |       |
|------------------------------------|---------|--------|--------|----|----|---------|-------|------|------|-------|
| Turkey                             | 163103  | 82340  | 198.08 | 25 | 8  | 28139.1 | 27710 | 76.4 | 18.5 | 27.1  |
| Uganda                             | 446     | 42729  | 1.04   | 47 | 2  | 1837.2  | 1780  | 62.5 | 1.7  | 12.4  |
| Ukraine                            | 23672   | 44246  | 53.50  | 16 | 16 | 9249.5  | 9030  | 72.5 | 29.9 | 66.6  |
| United Arab Emirates               | 33896   | 9631   | 351.95 | 15 | 1  | 67549.6 | 67870 | 77.2 | 25.3 | 57.3  |
| United Republic of Tanzania        | 509     | 56313  | 0.90   | 44 | 3  | 3240.3  | 3140  | 63.9 | 0.1  | 5.8   |
| United States of America           | 1716078 | 327096 | 524.64 | 19 | 16 | 62886.8 | 63780 | 78.6 | 26.1 | 145.5 |
| Uruguay                            | 816     | 3449   | 23.66  | 21 | 15 | 22116.8 | 20590 | 77.4 | 50.8 | 19.4  |
| Uzbekistan                         | 3554    | 32476  | 10.94  | 29 | 4  | 6898.9  | 7110  | 72.3 | 23.7 | 112.8 |
| Venezuela (Bolivarian Republic of) | 1370    | 28887  | 4.74   | 28 | 7  | N/A     | N/A   | 74.1 | N/A  | 9.4   |
| Viet Nam                           | 328     | 95546  | 0.34   | 23 | 7  | 7771.2  | 7230  | 76.3 | 8.3  | 14.5  |
| Yemen                              | 314     | 28499  | 1.10   | 40 | 3  | N/A     | N/A   | 65.3 | 5.3  | 7.9   |
| Zambia                             | 1057    | 17352  | 6.09   | 45 | 2  | 3599.0  | 3500  | 62.3 | 11.9 | 13.4  |
| Zimbabwe                           | 174     | 14439  | 1.21   | 42 | 3  | 3360.7  | 3350  | 61.4 | 2.1  | 19.3  |

SUPPLEMENTARY TABLE S1 (Continued)

| Nation                           | Hypertension prevalence (%) | Obesity prevalence (%) | Diabetes prevalence (%) | Annual PM2.5 concentrations in urban areas ( $\mu\text{g}/\text{m}^3$ ) | Daily ambient ultraviolet radiation ( $\text{J}/\text{m}^2$ ) | Population using safely-managed drinking-water services (%) | Population using safely-managed sanitation services (%) | Population using hand-washing facility with soap/water (%) | Inbound tourism (thousands) | Bachelor's or equivalent (ISCED 6) (%) |
|----------------------------------|-----------------------------|------------------------|-------------------------|-------------------------------------------------------------------------|---------------------------------------------------------------|-------------------------------------------------------------|---------------------------------------------------------|------------------------------------------------------------|-----------------------------|----------------------------------------|
| Afghanistan                      | 30.6                        | 5.5                    | 9.2                     | 59.900                                                                  | 4132                                                          | N/A                                                         | N/A                                                     | 38                                                         | N/A                         | N/A                                    |
| Albania                          | 29.0                        | 21.7                   | 9.0                     | 18.200                                                                  | 2542                                                          | 70                                                          | 40                                                      | N/A                                                        | 5927                        | N/A                                    |
| Algeria                          | 25.1                        | 27.4                   | 6.7                     | 34.500                                                                  | 3253                                                          | N/A                                                         | 18                                                      | 84                                                         | 2657                        | N/A                                    |
| Andorra                          | 18.7                        | 25.6                   | 7.7                     | 11.500                                                                  | 2469                                                          | 91                                                          | 100                                                     | N/A                                                        | 8328                        | 10.2                                   |
| Angola                           | 29.7                        | 8.2                    | 4.5                     | 28.400                                                                  | 5287                                                          | N/A                                                         | N/A                                                     | 27                                                         | N/A                         | N/A                                    |
| Antigua and Barbuda              | 23.4                        | 18.9                   | 13.1                    | 18.000                                                                  | 5148                                                          | N/A                                                         | N/A                                                     | N/A                                                        | 1062                        | N/A                                    |
| Argentina                        | 22.6                        | 28.3                   | 5.9                     | 11.700                                                                  | 3476                                                          | N/A                                                         | N/A                                                     | N/A                                                        | 10394                       | 20.0                                   |
| Armenia                          | 25.5                        | 20.2                   | 6.1                     | 32.900                                                                  | 2899                                                          | 86                                                          | 48                                                      | 94                                                         | N/A                         | 24.1                                   |
| Australia                        | 15.2                        | 29.0                   | 5.6                     | 7.300                                                                   | 3206                                                          | N/A                                                         | 76                                                      | N/A                                                        | 9246                        | 23.3                                   |
| Austria                          | 21.0                        | 20.1                   | 6.6                     | 13.100                                                                  | 1888                                                          | 99                                                          | 97                                                      | N/A                                                        | N/A                         | 2.8                                    |
| Azerbaijan                       | 24.5                        | 19.9                   | 6.1                     | 18.500                                                                  | 2702                                                          | 74                                                          | N/A                                                     | 83                                                         | 2850                        | 15.7                                   |
| Bahamas                          | 20.9                        | 31.6                   | 8.8                     | 19.000                                                                  | 4119                                                          | N/A                                                         | N/A                                                     | N/A                                                        | 6622                        | N/A                                    |
| Bahrain                          | 21.4                        | 29.8                   | 15.6                    | 69.000                                                                  | 4419                                                          | 99                                                          | 96                                                      | N/A                                                        | 12045                       | 20.2                                   |
| Bangladesh                       | 24.7                        | 3.6                    | 9.2                     | 58.600                                                                  | 4029                                                          | 55                                                          | N/A                                                     | 35                                                         | N/A                         | 5.3                                    |
| Barbados                         | 24.4                        | 23.1                   | 13.4                    | 22.400                                                                  | 5787                                                          | N/A                                                         | N/A                                                     | N/A                                                        | 1356                        | N/A                                    |
| Belarus                          | 27.1                        | 24.5                   | 5.0                     | 19.300                                                                  | 1795                                                          | 95                                                          | 81                                                      | N/A                                                        | 11502                       | N/A                                    |
| Belgium                          | 17.5                        | 22.1                   | 4.6                     | 13.000                                                                  | 1645                                                          | 100                                                         | 97                                                      | N/A                                                        | N/A                         | 19.8                                   |
| Belize                           | 22.7                        | 24.1                   | 17.1                    | 20.900                                                                  | 4639                                                          | N/A                                                         | N/A                                                     | 90                                                         | 1697                        | N/A                                    |
| Benin                            | 27.7                        | 9.6                    | 1.0                     | 30.400                                                                  | 5168                                                          | N/A                                                         | N/A                                                     | 11                                                         | 322                         | N/A                                    |
| Bhutan                           | 28.1                        | 6.4                    | 10.3                    | 35.400                                                                  | 4180                                                          | 36                                                          | N/A                                                     | N/A                                                        | N/A                         | 7.9                                    |
| Bolivia (Plurinational State of) | 17.9                        | 20.2                   | 6.8                     | 23.300                                                                  | 5344                                                          | N/A                                                         | 23                                                      | 25                                                         | N/A                         | N/A                                    |
| Bosnia and Herzegovina           | 30.8                        | 17.9                   | 9.0                     | 29.700                                                                  | 2205                                                          | 89                                                          | 22                                                      | N/A                                                        | N/A                         | 6.6                                    |
| Botswana                         | 29.6                        | 18.9                   | 5.8                     | 20.900                                                                  | 4868                                                          | N/A                                                         | N/A                                                     | N/A                                                        | 1775                        | N/A                                    |
| Brazil                           | 23.3                        | 22.1                   | 10.4                    | 11.800                                                                  | 4552                                                          | N/A                                                         | 49                                                      | N/A                                                        | N/A                         | 15.6                                   |
| Brunei Darussalam                | 18.9                        | 14.1                   | 13.3                    | 5.800                                                                   | 5148                                                          | N/A                                                         | N/A                                                     | N/A                                                        | 4521                        | N/A                                    |
| Bulgaria                         | 28.4                        | 25.0                   | 6.0                     | 20.800                                                                  | 2331                                                          | 97                                                          | 64                                                      | N/A                                                        | 12368                       | 24.7                                   |
| Burkina Faso                     | 32.6                        | 5.6                    | 7.3                     | 36.300                                                                  | 5567                                                          | N/A                                                         | N/A                                                     | 12                                                         | N/A                         | N/A                                    |

|                                  |      |      |      |        |      |     |     |     |        |      |
|----------------------------------|------|------|------|--------|------|-----|-----|-----|--------|------|
| Burundi                          | 29.2 | 5.4  | 5.1  | 35.600 | 5111 | N/A | N/A | 6   | N/A    | 0.9  |
| Cabo Verde                       | 29.5 | 11.8 | 2.4  | 31.600 | 5372 | N/A | N/A | N/A | N/A    | N/A  |
| Cambodia                         | 26.1 | 3.9  | 6.4  | 24.900 | 5152 | 26  | N/A | 66  | N/A    | N/A  |
| Cameroon                         | 24.8 | 11.4 | 6.0  | 65.400 | 5185 | N/A | N/A | 9   | N/A    | N/A  |
| Canada                           | 13.2 | 29.4 | 7.6  | 6.700  | 1887 | 99  | 82  | N/A | 31274  | 18.7 |
| Central African Republic         | 31.2 | 7.5  | 6.0  | 51.200 | 5498 | N/A | N/A | N/A | N/A    | N/A  |
| Chad                             | 32.9 | 6.1  | 6.0  | 50.800 | 5669 | N/A | N/A | 6   | N/A    | N/A  |
| Chile                            | 20.9 | 28.0 | 8.6  | 23.100 | 3982 | 99  | 77  | N/A | 6603   | 13.1 |
| China                            | 19.2 | 6.2  | 9.2  | 51.000 | 2908 | N/A | 72  | N/A | 158606 | N/A  |
| Colombia                         | 19.2 | 22.3 | 7.4  | 17.200 | 5385 | 73  | 17  | 65  | 4282   | 8.2  |
| Comoros                          | 27.9 | 7.8  | 12.3 | 18.600 | 5524 | N/A | N/A | N/A | N/A    | N/A  |
| Congo                            | 26.2 | 9.6  | 6.0  | 36.400 | 4943 | 45  | N/A | 48  | 158    | N/A  |
| Costa Rica                       | 18.7 | 25.7 | 9.1  | 16.700 | 4884 | 94  | N/A | N/A | 3300   | 18.4 |
| Côte d'Ivoire                    | 27.2 | 10.3 | 2.4  | 23.900 | 4931 | 37  | N/A | 19  | 1965   | N/A  |
| Croatia                          | 32.4 | 24.4 | 5.4  | 17.600 | 1976 | 90  | 58  | N/A | 57668  | N/A  |
| Cuba                             | 19.0 | 24.6 | 9.6  | 21.600 | 4401 | N/A | 44  | 85  | 4712   | N/A  |
| Cyprus                           | 19.8 | 21.8 | 9.0  | 17.100 | 3439 | 100 | 75  | N/A | 4024   | 16.4 |
| Czechia                          | 27.9 | 26.0 | 7.0  | 15.600 | 1707 | 98  | 94  | N/A | 34701  | 4.6  |
| Democratic Republic of the Congo | 28.5 | 6.7  | 6.0  | 37.400 | 5100 | N/A | N/A | 4   | N/A    | 3.3  |
| Denmark                          | 20.6 | 19.7 | 8.3  | 10.300 | 1691 | 97  | 95  | N/A | 30801  | 19.0 |
| Djibouti                         | 26.8 | 13.5 | 5.1  | 41.000 | 5461 | N/A | 36  | N/A | N/A    | N/A  |
| Dominica                         | 22.5 | 27.9 | 11.6 | 18.800 | 5464 | N/A | N/A | N/A | 198    | N/A  |
| Dominican Republic               | 21.5 | 27.6 | 8.6  | 13.300 | 4880 | N/A | N/A | 55  | 7576   | 16.9 |
| Ecuador                          | 17.9 | 19.9 | 5.5  | 15.500 | 4929 | 75  | 42  | 81  | 2535   | 10.9 |
| Egypt                            | 25.0 | 32.0 | 17.2 | 79.600 | 4202 | N/A | 61  | 90  | 11346  | 5.5  |
| El Salvador                      | 18.7 | 24.6 | 8.8  | 23.800 | 5364 | N/A | N/A | 91  | 2536   | 6.7  |
| Equatorial Guinea                | 28.4 | 8.0  | 6.0  | 49.100 | 4635 | N/A | N/A | N/A | N/A    | N/A  |
| Eritrea                          | 29.1 | 5.0  | 5.1  | 41.100 | 5914 | N/A | N/A | N/A | 142    | N/A  |
| Estonia                          | 27.4 | 21.2 | 4.2  | 7.000  | 1781 | 93  | 97  | N/A | 6071   | 3.3  |
| Eswatini                         | 29.8 | 16.5 | 4.5  | 16.200 | 3900 | N/A | N/A | 24  | 1277   | N/A  |
| Ethiopia                         | 30.3 | 4.5  | 4.3  | 34.000 | 5929 | 11  | N/A | 8   | N/A    | N/A  |
| Fiji                             | 21.7 | 30.2 | 14.7 | 10.500 | 4431 | N/A | N/A | N/A | 1058   | 3.7  |
| Finland                          | 19.4 | 22.2 | 5.6  | 6.500  | 1494 | 100 | 100 | N/A | N/A    | 12.4 |



|                                  |      |      |      |        |      |     |     |     |         |      |
|----------------------------------|------|------|------|--------|------|-----|-----|-----|---------|------|
| France                           | 22.0 | 21.6 | 4.8  | 12.400 | 1907 | 98  | 88  | N/A | 211998  | 8.5  |
| Gabon                            | 25.5 | 15.0 | 6.0  | 37.800 | 4654 | N/A | N/A | N/A | N/A     | N/A  |
| Gambia                           | 29.1 | 10.3 | 1.9  | 32.300 | 5358 | N/A | N/A | 8   | N/A     | N/A  |
| Georgia                          | 26.3 | 21.7 | 5.8  | 24.000 | 2489 | 80  | 27  | N/A | 7203    | 6.9  |
| Germany                          | 19.9 | 22.3 | 10.4 | 11.900 | 1812 | 100 | 97  | N/A | N/A     | 13.9 |
| Ghana                            | 23.7 | 10.9 | 2.5  | 31.100 | 5166 | 36  | N/A | 41  | N/A     | N/A  |
| Greece                           | 19.1 | 24.9 | 4.7  | 16.400 | 2753 | 100 | 90  | N/A | 33072   | 17.7 |
| Grenada                          | 24.3 | 21.3 | 10.7 | 21.800 | 4875 | 87  | N/A | N/A | 528     | N/A  |
| Guatemala                        | 21.2 | 21.2 | 10.0 | 24.200 | 5141 | 56  | N/A | 77  | 2406    | N/A  |
| Guinea                           | 30.3 | 7.7  | 2.4  | 22.200 | 5391 | N/A | N/A | 17  | N/A     | N/A  |
| Guinea-Bissau                    | 30.3 | 9.5  | 2.4  | 26.500 | 5319 | N/A | N/A | 6   | N/A     | N/A  |
| Guyana                           | 23.1 | 20.2 | 11.6 | 21.600 | 5203 | N/A | N/A | 77  | N/A     | N/A  |
| Haiti                            | 24.5 | 22.7 | 6.7  | 14.700 | 5016 | N/A | N/A | 23  | 1333    | N/A  |
| Honduras                         | 21.4 | 21.4 | 7.3  | 21.500 | 4924 | N/A | N/A | N/A | 2303    | 9.5  |
| Hungary                          | 30.0 | 26.4 | 6.9  | 16.300 | 1932 | 90  | 96  | N/A | 57667   | 11.8 |
| Iceland                          | 19.7 | 21.9 | 5.8  | 5.900  | 957  | 100 | 82  | N/A | 2488    | N/A  |
| India                            | 25.8 | 3.9  | 10.4 | 68.000 | 4514 | N/A | N/A | 60  | N/A     | N/A  |
| Indonesia                        | 23.8 | 6.9  | 6.3  | 16.400 | 5220 | N/A | N/A | 64  | 15810   | 8.8  |
| Iran (Islamic Republic of)       | 19.7 | 25.8 | 9.6  | 34.400 | 4038 | 92  | N/A | N/A | 7295    | 13.7 |
| Iraq                             | 25.2 | 30.4 | 8.8  | 60.100 | 3825 | 59  | 41  | 95  | N/A     | N/A  |
| Ireland                          | 19.7 | 25.3 | 3.2  | 8.700  | 1509 | 97  | 82  | N/A | N/A     | 18.6 |
| Israel                           | 16.6 | 26.1 | 9.7  | 19.400 | 3682 | 100 | 94  | N/A | 4389    | N/A  |
| Italy                            | 21.2 | 19.9 | 5.0  | 15.700 | 2444 | 95  | 96  | N/A | 93228.6 | N/A  |
| Jamaica                          | 21.8 | 24.7 | 11.3 | 13.600 | 4942 | N/A | N/A | N/A | 4319    | N/A  |
| Japan                            | 17.6 | 4.3  | 5.6  | 11.800 | 2521 | 98  | 99  | N/A | 31192   | N/A  |
| Jordan                           | 21.0 | 35.5 | 12.7 | 31.700 | 4026 | 94  | 81  | N/A | 4922    | N/A  |
| Kazakhstan                       | 27.1 | 21.0 | 6.1  | 14.500 | 2257 | 90  | N/A | 99  | 8789    | 34.0 |
| Kenya                            | 26.7 | 7.1  | 3.1  | 25.800 | 5803 | N/A | N/A | 25  | 1449    | N/A  |
| Kuwait                           | 23.6 | 37.9 | 12.2 | 58.900 | 4214 | 100 | 100 | N/A | 8508    | 9.8  |
| Kyrgyzstan                       | 26.7 | 16.6 | 6.1  | 17.400 | 3094 | 68  | N/A | 89  | 6947    | N/A  |
| Lao People's Democratic Republic | 24.8 | 5.3  | 6.4  | 25.500 | 4735 | 16  | 58  | 50  | 4186    | N/A  |
| Latvia                           | 29.4 | 23.6 | 5.0  | 14.400 | 1671 | 95  | 86  | N/A | 7775    | 15.4 |
| Lebanon                          | 20.7 | 32.0 | 11.2 | 30.700 | 2953 | 48  | 22  | N/A | N/A     | N/A  |
| Lesotho                          | 29.0 | 16.6 | 4.5  | 28.100 | 4439 | N/A | N/A | 2   | 1173    | N/A  |

|                  |      |      |      |        |       |     |     |     |       |      |
|------------------|------|------|------|--------|-------|-----|-----|-----|-------|------|
| Liberia          | 28.3 | 9.9  | 2.4  | 17.000 | 4926  | N/A | N/A | 1   | N/A   | N/A  |
| Libya            | 23.7 | 32.5 | 10.2 | 41.700 | 3861  | N/A | 26  | N/A | N/A   | N/A  |
| Lithuania        | 29.3 | 26.3 | 3.8  | 12.300 | 1801  | 92  | 91  | N/A | 6115  | 21.2 |
| Luxembourg       | 21.9 | 22.6 | 5.0  | 10.400 | 1687  | 100 | 97  | N/A | N/A   | N/A  |
| Madagascar       | 28.1 | 5.3  | 4.5  | 22.500 | 4771  | N/A | N/A | N/A | N/A   | N/A  |
| Malawi           | 28.9 | 5.8  | 4.5  | 21.900 | 5019  | N/A | N/A | 9   | N/A   | N/A  |
| Malaysia         | 22.9 | 15.6 | 16.7 | 17.300 | 5225  | 93  | 89  | N/A | N/A   | 9.7  |
| Maldives         | 24.4 | 8.6  | 9.2  | 7.700  | 10224 | N/A | N/A | 96  | N/A   | N/A  |
| Mali             | 32.6 | 8.6  | 2.4  | 29.000 | 5617  | N/A | N/A | 52  | N/A   | 2.1  |
| Malta            | 19.4 | 28.9 | 8.3  | 14.000 | 3091  | 100 | 93  | N/A | 3232  | 11.8 |
| Mauritania       | 31.7 | 12.7 | 7.1  | 41.700 | 5547  | N/A | N/A | 43  | 1002  | N/A  |
| Mauritius        | 25.0 | 10.8 | 22.0 | 13.500 | 5055  | N/A | N/A | N/A | 1431  | 7.6  |
| Mexico           | 19.7 | 28.9 | 13.5 | 20.900 | 4974  | 43  | 50  | 88  | 96497 | 14.5 |
| Monaco           | N/A  | N/A  | 2.9  | 12.200 | 1907  | 100 | 100 | N/A | N/A   | N/A  |
| Mongolia         | 29.0 | 20.6 | 4.7  | 49.500 | 2226  | 24  | N/A | 71  | 598   | N/A  |
| Montenegro       | 29.1 | 23.3 | 9.0  | 19.300 | N/A   | 94  | N/A | N/A | N/A   | N/A  |
| Morocco          | 26.1 | 26.1 | 7.0  | 31.100 | 3568  | 70  | 39  | N/A | 12489 | N/A  |
| Mozambique       | 29.1 | 7.2  | 3.3  | 18.400 | 4646  | N/A | N/A | N/A | 2870  | 1.6  |
| Myanmar          | 24.6 | 5.8  | 3.9  | 34.600 | 4565  | N/A | N/A | 79  | N/A   | N/A  |
| Namibia          | 28.5 | 17.2 | 4.5  | 21.000 | 5305  | N/A | N/A | 45  | 1581  | N/A  |
| Nepal            | 29.4 | 4.1  | 7.2  | 99.500 | 4130  | 27  | N/A | 48  | N/A   | N/A  |
| Netherlands      | 18.7 | 20.4 | 5.4  | 12.100 | 1662  | 100 | 97  | N/A | N/A   | 19.1 |
| New Zealand      | 16.2 | 30.8 | 6.2  | 5.800  | 2487  | 100 | 89  | N/A | 3858  | 22.5 |
| Nicaragua        | 20.8 | 23.7 | 11.4 | 19.000 | 5078  | 52  | N/A | N/A | 1412  | N/A  |
| Niger            | 33.4 | 5.5  | 2.4  | 73.000 | 5811  | N/A | 10  | N/A | N/A   | N/A  |
| Nigeria          | 23.9 | 8.9  | 3.1  | 46.300 | 5251  | 20  | 27  | 42  | 5265  | N/A  |
| North Macedonia  | 28.5 | 22.4 | 9.3  | 33.000 | N/A   | 81  | 17  | N/A | N/A   | N/A  |
| Norway           | 19.7 | 23.1 | 5.3  | 7.800  | 1439  | 98  | 76  | N/A | N/A   | 16.4 |
| Oman             | 24.8 | 27.0 | 10.1 | 36.200 | 5102  | 90  | N/A | 97  | 3242  | N/A  |
| Pakistan         | 30.5 | 8.6  | 19.9 | 56.200 | 4227  | 35  | N/A | 60  | N/A   | 6.8  |
| Panama           | 19.9 | 22.7 | 7.7  | 12.000 | 4898  | v   | N/A | N/A | 2487  | N/A  |
| Papua New Guinea | 25.6 | 21.3 | 17.9 | 11.500 | 5377  | N/A | N/A | N/A | 195   | N/A  |
| Paraguay         | 24.6 | 20.3 | 9.6  | 11.700 | 4038  | 64  | 58  | 80  | 4183  | 6.1  |
| Peru             | 13.7 | 19.7 | 6.6  | 29.000 | 5906  | 50  | 43  | N/A | 5384  | 10.0 |
| Philippines      | 22.6 | 6.4  | 7.1  | 18.700 | 4928  | 47  | 52  | 78  | N/A   | 15.6 |
| Poland           | 28.7 | 23.1 | 6.1  | 21.500 | 1749  | 100 | 93  | N/A | 85946 | 5.7  |

|                                  |      |      |      |        |      |     |     |     |        |      |
|----------------------------------|------|------|------|--------|------|-----|-----|-----|--------|------|
| Portugal                         | 24.4 | 20.8 | 9.8  | 8.100  | 2585 | 95  | 85  | N/A | N/A    | 5.0  |
| Qatar                            | 22.4 | 35.1 | 15.6 | 91.700 | 4905 | 96  | 96  | N/A | N/A    | 17.6 |
| Republic of Korea                | 11.0 | 4.7  | 6.9  | 24.700 | 2535 | 98  | 100 | N/A | 15347  | N/A  |
| Republic of Moldova              | 29.8 | 18.9 | 5.7  | 16.500 | 1910 | 73  | N/A | N/A | N/A    | 19.0 |
| Romania                          | 30.0 | 22.5 | 6.9  | 15.400 | 2403 | 82  | 77  | N/A | 11720  | N/A  |
| Russian Federation               | 27.2 | 23.1 | 6.1  | 14.700 | 2071 | 76  | 61  | N/A | 24551  | N/A  |
| Rwanda                           | 26.7 | 5.8  | 5.1  | 40.700 | 1795 | N/A | N/A | 5   | 1307   | 3.8  |
| Saint Kitts and Nevis            | 25.3 | 22.9 | 13.3 | 12.300 | 5130 | N/A | N/A | N/A | 1278   | N/A  |
| Saint Lucia                      | 27.1 | 19.7 | 11.6 | 21.200 | 5009 | N/A | N/A | N/A | 1165   | N/A  |
| Saint Vincent and the Grenadines | 23.3 | 23.7 | 11.6 | 21.400 | 5164 | N/A | N/A | N/A | 356    | N/A  |
| San Marino                       | N/A  | N/A  | 5.9  | 13.400 | 4966 | 100 | 77  | N/A | 1874   | 4.3  |
| São Tomé and Príncipe            | 25.8 | 12.4 | 2.4  | 25.200 | 1932 | N/A | N/A | 41  | N/A    | N/A  |
| Saudi Arabia                     | 23.3 | 35.4 | 15.8 | 86.700 | 4422 | N/A | 78  | N/A | 17570  | 23.5 |
| Senegal                          | 30.2 | 8.8  | 2.4  | 39.700 | 5384 | N/A | 21  | 24  | 1376   | 1.2  |
| Serbia                           | 29.5 | 21.5 | 9.0  | 24.700 | N/A  | 75  | 25  | N/A | N/A    | 12.7 |
| Seychelles                       | 23.5 | 14.0 | 12.3 | 18.600 | 5356 | N/A | N/A | N/A | 405    | N/A  |
| Sierra Leone                     | 30.3 | 8.7  | 2.4  | 20.600 | 5570 | 10  | 13  | 19  | 66     | N/A  |
| Singapore                        | 14.6 | 6.1  | 2.4  | 18.300 | 5087 | 100 | 100 | N/A | 18508  | 31.6 |
| Slovakia                         | 28.5 | 20.5 | 6.5  | 18.000 | 3979 | 100 | 83  | N/A | 23092  | 2.1  |
| Slovenia                         | 30.5 | 20.2 | 5.9  | 16.400 | 1795 | 98  | 83  | N/A | N/A    | 5.4  |
| Somalia                          | 32.9 | 8.3  | 5.1  | 28.000 | 4071 | N/A | N/A | 10  | N/A    | N/A  |
| South Africa                     | 26.9 | 28.3 | 12.7 | 24.300 | 5773 | N/A | N/A | 44  | 15004  | 6.8  |
| South Sudan                      | N/A  | N/A  | 10.2 | 40.900 | 4111 | N/A | N/A | N/A | N/A    | N/A  |
| Spain                            | 19.2 | 23.8 | 6.9  | 9.800  | 2705 | 98  | 97  | N/A | 124060 | 9.0  |
| Sri Lanka                        | 22.4 | 5.2  | 10.7 | 15.100 | 5264 | N/A | N/A | N/A | 2521   | 3.6  |
| Sudan                            | N/A  | N/A  | 22.1 | 46.800 | 5783 | N/A | N/A | 23  | 3093   | N/A  |
| Suriname                         | 22.4 | 26.4 | 12.5 | 25.800 | 4799 | N/A | N/A | N/A | 279    | N/A  |
| Sweden                           | 19.3 | 20.6 | 4.8  | 6.100  | 1587 | 100 | 93  | N/A | N/A    | 12.4 |
| Switzerland                      | 18.0 | 19.5 | 5.7  | 10.400 | 2158 | 95  | 100 | N/A | N/A    | 18.8 |
| Syrian Arab Republic             | 24.5 | 27.8 | 13.5 | 37.400 | 3501 | N/A | N/A | 71  | N/A    | N/A  |
| Tajikistan                       | 26.1 | 14.2 | 6.1  | 42.800 | 3538 | 48  | N/A | 73  | 1035   | 0.9  |

|                                    |      |      |      |        |      |     |     |     |            |      |
|------------------------------------|------|------|------|--------|------|-----|-----|-----|------------|------|
| Thailand                           | 22.3 | 10.0 | 7.0  | 26.600 | 4862 | N/A | N/A | 84  | N/A        | 12.8 |
| The United Kingdom                 | 15.2 | 27.8 | 3.9  | 10.600 | 1576 | 100 | 98  | N/A | 37905      | 17.2 |
| Timor-Leste                        | 27.6 | 3.8  | 6.7  | 18.200 | 5637 | N/A | N/A | 28  | N/A        | N/A  |
| Togo                               | 28.9 | 8.4  | 2.4  | 31.200 | 5307 | N/A | N/A | 10  | N/A        | N/A  |
| Trinidad and Tobago                | 25.8 | 18.6 | 11.0 | 22.400 | 5245 | N/A | N/A | N/A | 501        | N/A  |
| Tunisia                            | 23.2 | 26.9 | 8.5  | 35.700 | 3262 | 93  | 78  | 79  | N/A        | 15.2 |
| Turkey                             | 20.3 | 32.1 | 11.1 | 41.200 | 2924 | N/A | 65  | N/A | 46113      | 16.7 |
| Uganda                             | 27.3 | 5.3  | 2.5  | 48.700 | 5499 | 7   | N/A | 21  | N/A        | N/A  |
| Ukraine                            | 27.1 | 24.1 | 6.1  | 19.400 | 1843 | 92  | 68  | N/A | 14342      | N/A  |
| United Arab Emirates               | 21.1 | 31.7 | 16.3 | 37.200 | 4862 | N/A | 96  | N/A | N/A        | 37.2 |
| United Republic of Tanzania        | 27.3 | 8.4  | 5.7  | 25.100 | 5483 | N/A | 25  | 48  | 1506       | N/A  |
| United States of America           | 12.9 | 36.2 | 10.8 | 7.600  | 2736 | 100 | 90  | N/A | 169324.918 | 21.9 |
| Uruguay                            | 20.7 | 27.9 | 7.3  | 8.700  | 3235 | N/A | N/A | N/A | 3954       | 9.4  |
| Uzbekistan                         | 25.6 | 16.6 | 6.5  | 28.900 | 3172 | 59  | N/A | N/A | 5346       | 16.3 |
| Venezuela (Bolivarian Republic of) | 18.6 | 25.6 | 7.0  | 16.800 | 5211 | N/A | 24  | N/A | 429        | 24.1 |
| Viet Nam                           | 23.4 | 2.1  | 6.0  | 30.100 | 4293 | N/A | N/A | 86  | 15498      | N/A  |
| Yemen                              | 30.7 | 17.1 | 5.4  | 44.300 | 6089 | N/A | N/A | 50  | N/A        | N/A  |
| Zambia                             | 27.1 | 8.1  | 4.5  | 23.800 | 5265 | N/A | N/A | 14  | N/A        | N/A  |
| Zimbabwe                           | 28.2 | 15.5 | 1.8  | 19.100 | 4918 | N/A | N/A | 37  | 2580       | 2.6  |

GDP, Gross Domestic Product; GNI, Gross National Income; ISCED, International Standard Classification of Education; N/A, not available; PM2.5, particulate matter 2.5; PPP, Purchasing Power Parity
